# Supplementary material for: Association between Early Phase Serum Albumin Levels and Outcomes of Post-Cardiac Arrest Patients: A Systematic Review and Meta-Analysis
Source: MDPI journal article supplement (doi:10.3390/jpm12111787), 2022-10-29
Supplement: s1 [file s1]

**Table S1.** Comprehensive list presenting the search strategy.

EMBASE (1974 to 2022 July 01)

|   |                                                                                                                                                                                                                                                                                                                                                                                                                                                                           |        |
|---|---------------------------------------------------------------------------------------------------------------------------------------------------------------------------------------------------------------------------------------------------------------------------------------------------------------------------------------------------------------------------------------------------------------------------------------------------------------------------|--------|
| 1 | (return of spontaneous circulation or ROSC).ti,ab. or exp heart arrest/ or cardiac arrest*.ti,ab. or cardiovascular arrest*.ti,ab. or heart arrest*.ti,ab. or cardiopulmonary arrest*.ti,ab. or asystol*.ti,ab. or pulseless electrical activity.ti,ab. or exp ventricular fibrillation/ or exp advanced cardiac life support/ or (advanced cardiac life support or ACLS).ti,ab. or exp cardiopulmonary resuscitation/ or CPR.mp. or cardiopulmonary resuscitation.ti,ab. | 240736 |
| 2 | albumin.ti,ab.                                                                                                                                                                                                                                                                                                                                                                                                                                                            | 30624  |
| 3 | 1 and 2                                                                                                                                                                                                                                                                                                                                                                                                                                                                   | 252    |

MEDLINE (1946 to July 01, 2022)

|   |                                                                                                                                                                                                                                                                                                                                                                                                                                                                           |        |
|---|---------------------------------------------------------------------------------------------------------------------------------------------------------------------------------------------------------------------------------------------------------------------------------------------------------------------------------------------------------------------------------------------------------------------------------------------------------------------------|--------|
| 1 | (return of spontaneous circulation or ROSC).ti,ab. or exp heart arrest/ or cardiac arrest*.ti,ab. or cardiovascular arrest*.ti,ab. or heart arrest*.ti,ab. or cardiopulmonary arrest*.ti,ab. or asystol*.ti,ab. or pulseless electrical activity.ti,ab. or exp ventricular fibrillation/ or exp advanced cardiac life support/ or (advanced cardiac life support or ACLS).ti,ab. or exp cardiopulmonary resuscitation/ or CPR.mp. or cardiopulmonary resuscitation.ti,ab. | 103830 |
| 2 | album.ti,ab.                                                                                                                                                                                                                                                                                                                                                                                                                                                              | 25408  |
| 3 | 1 and 2                                                                                                                                                                                                                                                                                                                                                                                                                                                                   | 36     |

Cochrane

|   |                                                                        |      |
|---|------------------------------------------------------------------------|------|
| 1 | MeSH descriptor: [Return of Spontaneous Circulation] explode all trees | 5    |
| 2 | MeSH descriptor: [Heart Arrest] explode all trees                      | 2159 |
| 3 | MeSH descriptor: [Advanced Cardiac Life Support] explode all trees     | 62   |
| 4 | MeSH descriptor: [Resuscitation] explode all trees                     | 5625 |
| 5 | #1 or #2 or #3 or #4                                                   | 7003 |
| 6 | MeSH descriptor: [Albumins] explode all trees                          | 8360 |
|   | #5 and #6                                                              | 80   |

**Table S2.** Characteristics of excluded from meta-analysis.

|   | Author    | Year | Title                                                                                                                                                                                                                 | Reason for exclusion       |
|---|-----------|------|-----------------------------------------------------------------------------------------------------------------------------------------------------------------------------------------------------------------------|----------------------------|
| 1 | Matsuyama | 2018 | Prognostic Impact of Serum Albumin Concentration for Neurologically Favorable Outcome in Patients Treated with Targeted Temperature Management After Out-of-Hospital Cardiac Arrest: A Multicenter Prospective Study. | Irrelevant outcome measure |
| 2 | Matsuyama | 2018 | Effect of Serum Albumin Concentration on Neurological Outcome After Out-of-Hospital Cardiac Arrest.                                                                                                                   | Irrelevant outcome measure |
| 3 | Park      | 2012 | Prognostic significance of serum albumin on long-term mortality in survivors from out-of-hospital cardiac arrest.                                                                                                     | Irrelevant outcome measure |
| 4 | Kong      | 2020 | The Prognostic Usefulness of the Lactate/Albumin Ratio for Predicting Clinical Outcomes in Out-of-Hospital Cardiac Arrest: A Prospective, Multicenter Observational Study (koCARC) Study.                             | Duplicate Data             |
| 5 | Yoon      | 2020 | Effect of serum albumin level on hospital outcomes in out-of-hospital cardiac arrest.                                                                                                                                 | Irrelevant outcome measure |

**Table S3.** Baseline characteristics of individuals in the included studies.

| Author            | Outcome       | Sample size, n | OHCA, % | Age              | Male, % | Witness, % | Bystander CPR, % | Shockable rhythm, % | TTM, % |
|-------------------|---------------|----------------|---------|------------------|---------|------------|------------------|---------------------|--------|
| Bingol Tanriverdi | Survivors     | 43             | 100     | 60.3 ± 11.9      | 67.4    | -          | -                | -                   | -      |
|                   | Non-survivors | 59             | 100     | 61.5 ± 13.0      | 76.3    | -          | -                | -                   | -      |
| Kim               | GNO           | 84             | 100     | 48.3 ± 15.2      | 76.2    | 85.7       | 61.9             | 81.0                | 100    |
|                   | PNO           | 171            | 100     | 57.9 ± 16.5      | 67.8    | 64.7       | 52.9             | 17.5                | 100    |
| Kokulu            | Survivors     | 42             | 100     | 62 ± 11          | 66.7    | 76.2       | 54.8             | 61.9                | 64.2   |
|                   | Non-survivors | 193            | 100     | 68 ± 12          | 57.5    | 57.5       | 43.0             | 26.4                | 24.3   |
| Lee               | Survivors     | 204            | 100     | 60.7 ± 17.2      | 71.1    | 79.9       | 37.7             | 31.9                | 47.1   |
|                   | Non-survivors | 485            | 100     | 65.1 ± 17.3      | 69.9    | 70.1       | 44.9             | 15.9                | 32.4   |
|                   | GNO           | 81             | 100     | 56.7 ± 16.9      | 69.1    | 88.9       | 37.0             | 49.4                | 35.8   |
|                   | PNO           | 608            | 100     | 64.7 ± 17.2      | 70.4    | 70.9       | 43.6             | 16.8                | 36.8   |
| Li                | Overall       | 2414           | -       | 64 (53-74)       | 57.1    | -          | -                | -                   | -      |
|                   | Survivors     | 1065           | -       | 63 (52-73)       | 59.0    | -          | -                | -                   | -      |
|                   | Non-survivors | 1349           | -       | 66 (55-75)       | 55.7    | -          | -                | -                   | -      |
| Son               | Overall       | 59             | 100     | 57.8 (52.9-62.7) | 72.9    | 76.3       | -                | 23.7                | 69.5   |
|                   | GNO           | 13             | 100     | 48.9 (39.6-58.3) | 46.2    | 92.3       | -                | 61.5                | 76.9   |
|                   | PNO           | 46             | 100     | 60.3 (54.6-66.0) | 80.4    | 71.7       | -                | 13.0                | 67.4   |
| You               | Overall       | 83             | -       | 52.0 (42.0-68.0) | 71.1    | 66.3       | 44.6             | 34.9                | 100    |
|                   | GNO           | 28             | -       | 44.0 (30.5-51.5) | 82.1    | 75.0       | 57.1             | 46.4                | 100    |
|                   | PNO           | 55             | -       | 60.0 (47.0-73.0) | 65.5    | 61.8       | 38.2             | 29.1                | 100    |

**Table S4.** Detailed quality assessment of included studies using the Quality of Prognosis Studies in Systematic Reviews (QUIPS).

| Biases                                                               | Study number                                                                            |   |   |   |   |   |   |
|----------------------------------------------------------------------|-----------------------------------------------------------------------------------------|---|---|---|---|---|---|
|                                                                      | 1                                                                                       | 2 | 3 | 4 | 5 | 6 | 7 |
|                                                                      | Rating of reporting (yes, partial, no, unsure) and “Risk of bias” (high, moderate, low) |   |   |   |   |   |   |
| <b>Study Participation</b>                                           |                                                                                         |   |   |   |   |   |   |
| Source of target population                                          | Y                                                                                       | Y | Y | Y | Y | Y | Y |
| Method used to identify population                                   | Y                                                                                       | Y | Y | Y | Y | Y | Y |
| Recruitment period                                                   | P                                                                                       | Y | Y | Y | Y | Y | Y |
| Place of recruitment                                                 | Y                                                                                       | Y | Y | Y | Y | Y | Y |
| Inclusion and exclusion criteria                                     | Y                                                                                       | Y | Y | Y | Y | Y | Y |
| Adequate study participation                                         | Y                                                                                       | Y | Y | Y | Y | Y | Y |
| Baseline characteristics                                             | Y                                                                                       | Y | Y | Y | Y | Y | Y |
| <b>Summary Study participation</b>                                   | L                                                                                       | L | L | L | L | L | L |
| <b>Study Attrition</b>                                               |                                                                                         |   |   |   |   |   |   |
| Proportion of baseline sample available for analysis                 | N                                                                                       | Y | Y | Y | Y | Y | Y |
| Attempts to collect information on participants who dropped out      | P                                                                                       | Y | U | Y | Y | U | Y |
| Reasons and potential impact of subjects lost to follow-up           | N                                                                                       | U | U | Y | Y | Y | Y |
| Outcome and prognostic factor information on those lost to follow-up | N                                                                                       | N | N | Y | Y | N | Y |
| <b>Study Attrition Summary</b>                                       | H                                                                                       | H | H | L | L | H | L |
| <b>Prognostic Factor Measurement</b>                                 |                                                                                         |   |   |   |   |   |   |
| Definition of the PF                                                 | Y                                                                                       | Y | Y | Y | Y | Y | Y |
| Valid and Reliable Measurement of PF                                 | Y                                                                                       | Y | Y | Y | Y | Y | Y |
| Method and Setting of PF Measurement                                 | Y                                                                                       | Y | Y | Y | Y | Y | Y |
| Proportion of data on PF available for analysis                      | Y                                                                                       | Y | Y | Y | Y | Y | Y |
| Method used for missing data                                         | P                                                                                       | P | P | P | Y | P | Y |
| <b>PF Measurement Summary</b>                                        | L                                                                                       | L | L | L | L | L | L |

Modified from: Hayden JA, Côté P, Bombardier C. Evaluation of the Quality of Prognosis Studies in Systematic Reviews. *Annals of Internal Medicine*. 2006;144:427-437, with the assistance of the QUIPS-LBP Working Group.  
Abbreviations: Y, yes; P, partial; N, no; U, unsure; H, high; M, moderate; L, low

**Table S4.** (Cont.)

| <b>Biases</b>                                        | <b>Study number</b> |          |          |          |          |          |          |
|------------------------------------------------------|---------------------|----------|----------|----------|----------|----------|----------|
|                                                      | <b>1</b>            | <b>2</b> | <b>3</b> | <b>4</b> | <b>5</b> | <b>6</b> | <b>7</b> |
| <b>Outcome Measurement</b>                           |                     |          |          |          |          |          |          |
| Definition of the Outcome                            | Y                   | Y        | Y        | Y        | Y        | Y        | Y        |
| Valid and Reliable Measurement of Outcome            | Y                   | Y        | Y        | Y        | Y        | Y        | Y        |
| Method and Setting of Outcome Measurement            | P                   | Y        | Y        | Y        | Y        | P        | Y        |
| <b>Outcome Measurement Summary</b>                   | L                   | L        | L        | L        | L        | L        | L        |
| <b>Study Confounding</b>                             |                     |          |          |          |          |          |          |
| Important Confounders Measured                       | U                   | Y        | Y        | P        | Y        | Y        | Y        |
| Definition of the confounding factor                 | N                   | Y        | P        | U        | N        | Y        | U        |
| Valid and Reliable Measurement of Confounders        | N                   | Y        | Y        | P        | N        | Y        | Y        |
| Method and Setting of Confounding Measurement        | Y                   | Y        | Y        | Y        | N        | Y        | Y        |
| Method used for missing data                         | N                   | N        | P        | U        | P        | P        | Y        |
| Appropriate Accounting for Confounding               | P                   | Y        | Y        | P        | N        | Y        | Y        |
| <b>Study Confounding Summary</b>                     | H                   | L        | L        | H        | H        | L        | L        |
| <b>Statistical Analysis and Reporting</b>            |                     |          |          |          |          |          |          |
| Presentation of analytical strategy                  | Y                   | Y        | Y        | Y        | Y        | Y        | Y        |
| Model development strategy                           | Y                   | Y        | Y        | Y        | Y        | Y        | Y        |
| Reporting of results                                 | Y                   | Y        | Y        | Y        | Y        | Y        | Y        |
| <b>Statistical Analysis and Presentation Summary</b> | L                   | L        | L        | L        | L        | L        | L        |

Modified from: Hayden JA, Côté P, Bombardier C. Evaluation of the Quality of Prognosis Studies in Systematic Reviews. *Annals of Internal Medicine*. 2006;144:427-437, with the assistance of the QUIPS-LBP Working Group.  
Abbreviations: Y, yes; P, partial; N, no; U, unsure; H, high; M, moderate; L, low

## References

1. Bingol Tanriverdi, T.; Patmano, G.; Bozkurt, F.T.; Kaya, B.C.; Tercan, M. Prognostic value of C-reactive protein to albumin ratio in patients resuscitated from out-of-hospital cardiac arrest. *Int. J. Clin. Pr.* **2021**, *75*, e14227, <https://doi.org/10.1111/ijcp.14227>
2. Kim, S.H.; Youn, C.S.; Kim, H.J.; Choi, S.P. Prognostic value of serum albumin at admission for neurologic outcome with targeted temperature management after cardiac arrest. *Emerg. Med. Int.* **2019**, *2019*, 6132542. <https://doi.org/10.1155/2019/6132542>
3. Kokulu, K.; Sert, E.T. The role of the lactate/albumin ratio in predicting survival outcomes in patients resuscitated after out-of-hospital cardiac arrest: A preliminary report. *Am. J. Emerg. Med.* **2021**, *50*, 670–674, <https://doi.org/10.1016/j.ajem.2021.09.059>
4. Lee, J.; Lee, H.; Oh, J.; Lim, T.H.; Kang, H.; Ko, B.S.; Cho, Y.; The Korean Cardiac Arrest Research Consortium KoCARC Investigators. Association between Initial Serum cholesterol Levels and Outcomes of Patients Hospitalized after Out-of-Hospital Cardiac Arrest: A Retrospective Multicenter Registry Study. *J. Pers. Med.* **2022**, *12*, 233. <https://doi.org/10.3390/jpm12020233>
5. Li, Y.; She, Y.; Mo, W.; Jin, B.; Xiang, W.; Luo, L. Albumin level at admission to the Intensive Care Unit is associated with prognosis in cardiac arrest patients. *Cureus* **2021**, *13*, <https://doi.org/10.7759/cureus.14501>
6. Son, Y.S.; Kim, K.S.; Suh, G.J.; Kwon, W.Y.; Park, M.J.; Ko, J.I.; Kim, T. Admission levels of high-density lipoprotein and apolipoprotein A-1 are associated with the neurologic outcome in patients with out-of-hospital cardiac arrest. *Clin. Exp. Emerg. Med.* **2017**, *4*, 232–237, <https://doi.org/10.15441/ceem.16.164>
7. You, Y.; Park, J.; Min, J.; Yoo, I.; Jeong, W.; Cho, Y.; Ryu, S.; Lee, J.; Kim, S.; Cho, S.; et al. Relationship between time related serum albumin concentration, optic nerve sheath diameter, cerebrospinal fluid pressure, and neurological prognosis in cardiac arrest survivors. *Resuscitation* **2018**, *131*, 42–47. <https://doi.org/10.1016/j.resuscitation.2018.08.003>

**Table S5.** Sensitivity analysis with prognostic value of serum albumin level for predicting poor neurologic outcome in post-cardiac arrest patients.

| Study             | ONSD, SMD (95% CI) | p-value | I <sup>2</sup> , % | p-value for heterogeneity |
|-------------------|--------------------|---------|--------------------|---------------------------|
| All               | 1.01 [0.49, 1.52]  | < 0.001 | 87                 | < 0.001                   |
| Omitting Kim 2019 | 1.01 [0.24, 1.79]  | 0.01    | 89                 | < 0.001                   |
| Omitting Lee 2022 | 1.20 [0.46, 1.95]  | 0.002   | 87                 | 0.0004                    |
| Omitting Son 2017 | 0.74 [0.35, 1.13]  | < 0.001 | 79                 | 0.008                     |
| Omitting You 2018 | 1.20 [0.54, 1.85]  | < 0.001 | 91                 | < 0.001                   |

**Table S6.** Evidence profile of main results using GRADE.

| Result                                    | Quality assessment      |                         |              |                      |              |             |                  | Overall quality of evidence |
|-------------------------------------------|-------------------------|-------------------------|--------------|----------------------|--------------|-------------|------------------|-----------------------------|
|                                           | Participants (studies)  | Design                  | Risk of bias | Inconsistency        | Indirectness | Imprecision | Publication bias |                             |
| Albumin for predicting survival outcome   | 3440 (4)                | Observational studies   | No serious   | No serious           | No serious   | No serious  | Undetected       | Low                         |
| Albumin for predicting neurologic outcome | 2027 (4)                | Observational studies   | No serious   | No serious           | No serious   | No serious  | Undetected       | Low                         |
| Result                                    | Summary of findings     |                         |              |                      |              |             |                  | Importance                  |
|                                           | No of patients          |                         | Effect       |                      |              |             |                  |                             |
|                                           | Survival                | Non-survival            | Relative     | Absolute             |              |             |                  |                             |
| Albumin for predicting survival outcome   | 1354                    | 2086                    |              | SMD 0.55 (0.48-0.62) |              | Critical    |                  |                             |
|                                           | No of patients          |                         | Effect       |                      |              |             |                  |                             |
|                                           | Good neurologic outcome | Poor neurologic outcome | Relative     | Absolute             |              |             |                  |                             |
| Albumin for predicting neurologic outcome | 206                     | 880                     |              | SMD 1.01 (0.19-1.52) |              | Critical    |                  |                             |

Abbreviations: GRADE, The Grading of Recommendations Assessment, Development and Evaluation; SMD, standardized mean difference



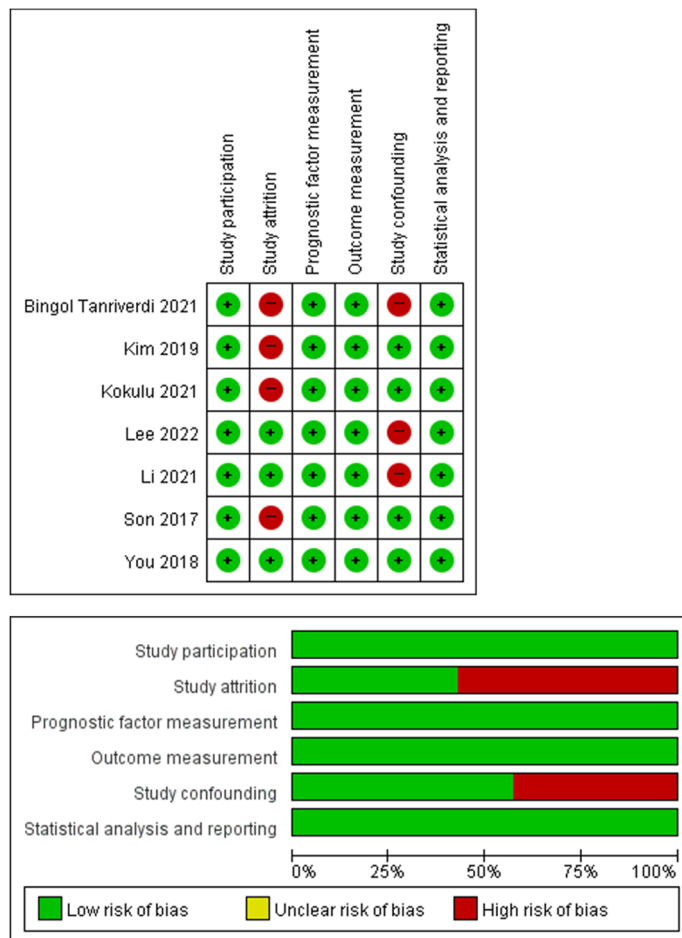

**Figure S1.** Risk of bias assessment. Author's judgments about each risk of bias item for each included study

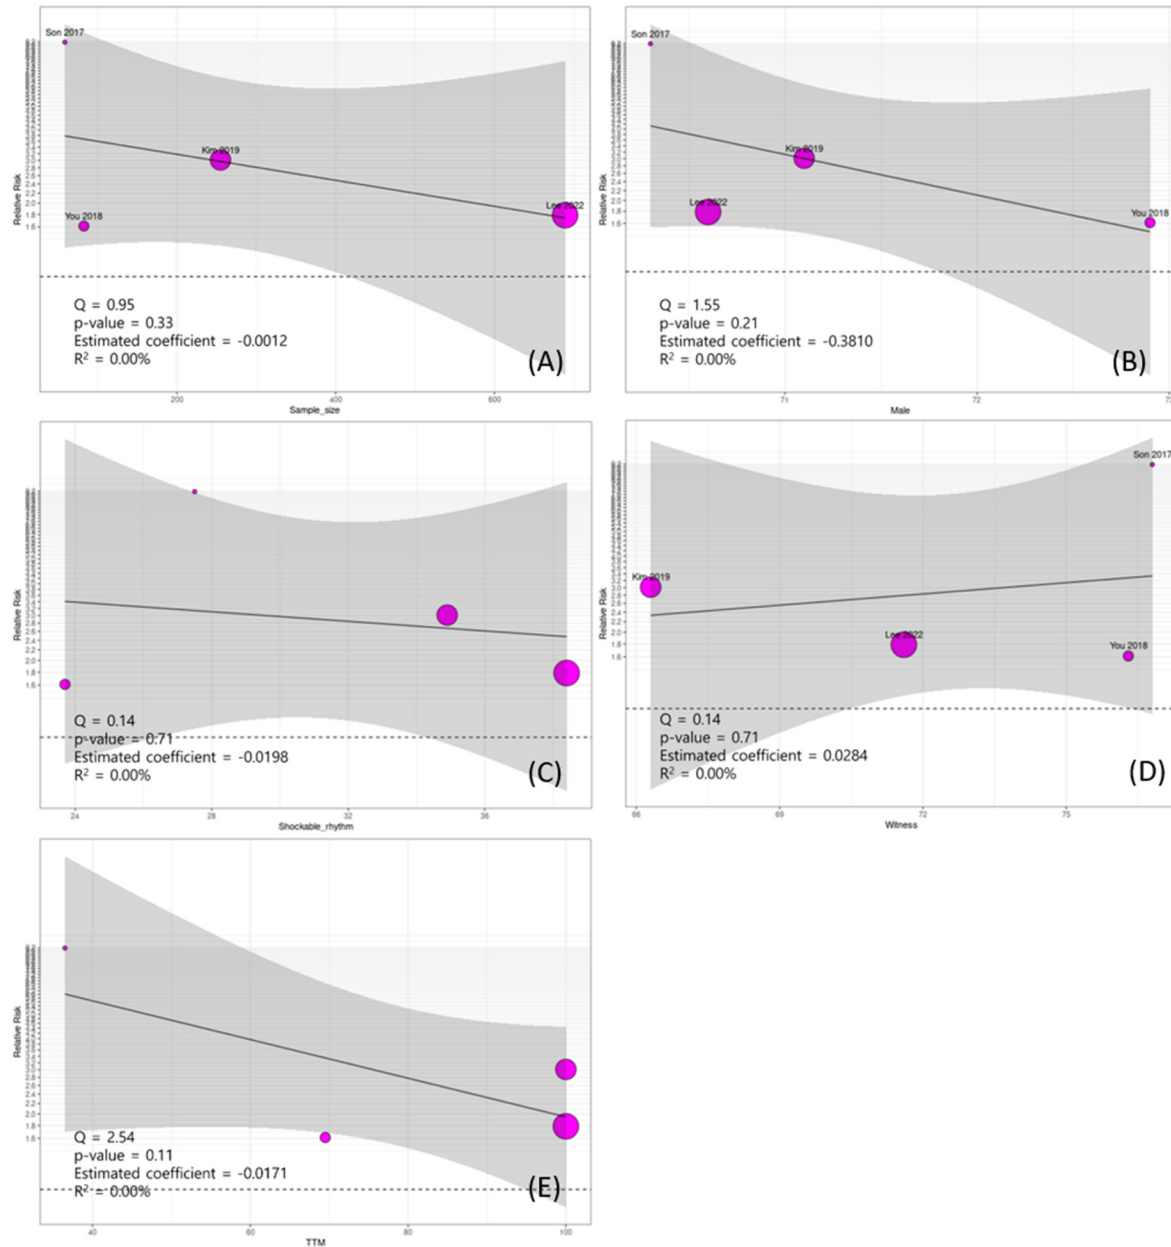

**Figure S2.** Mixed-effects model meta-regression analysis: Association between the initial albumin level and neurologic outcome in post-cardiac arrest survivors determined using (A) sample size, (B) proportion of male gender, (C) initial shockable rhythm (D) witness arrest, and (E) proportion of targeted temperature management regression.

Random-Effects Model

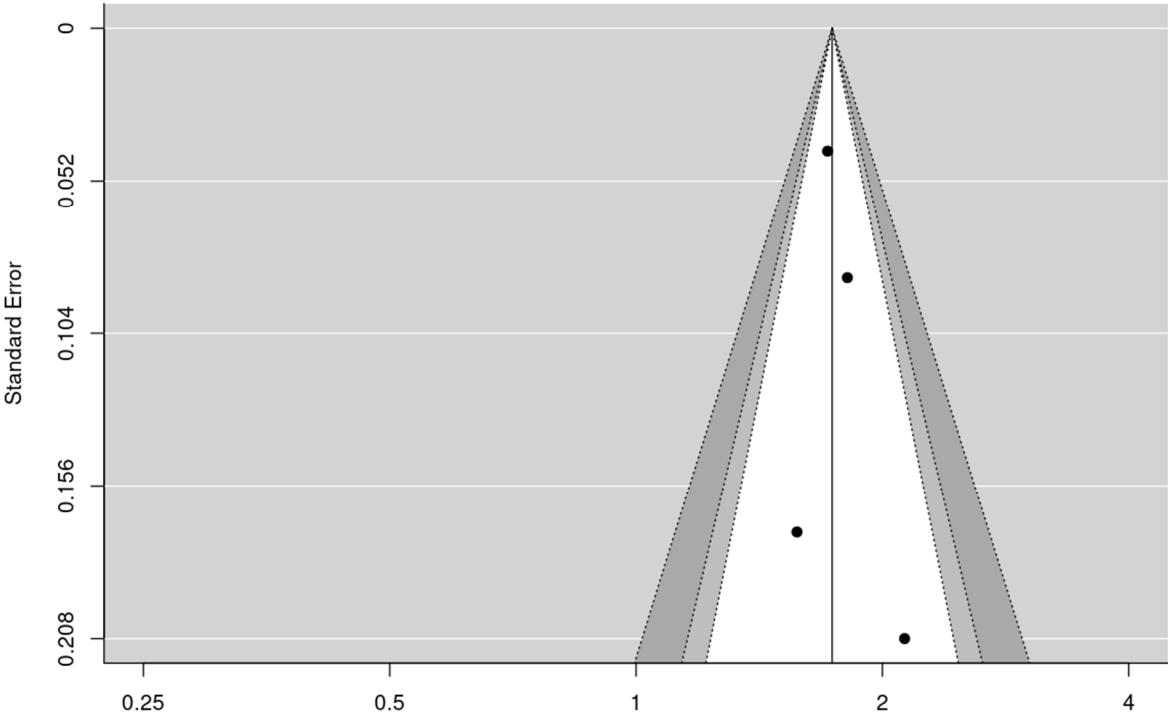

Observed Outcome  
(A)

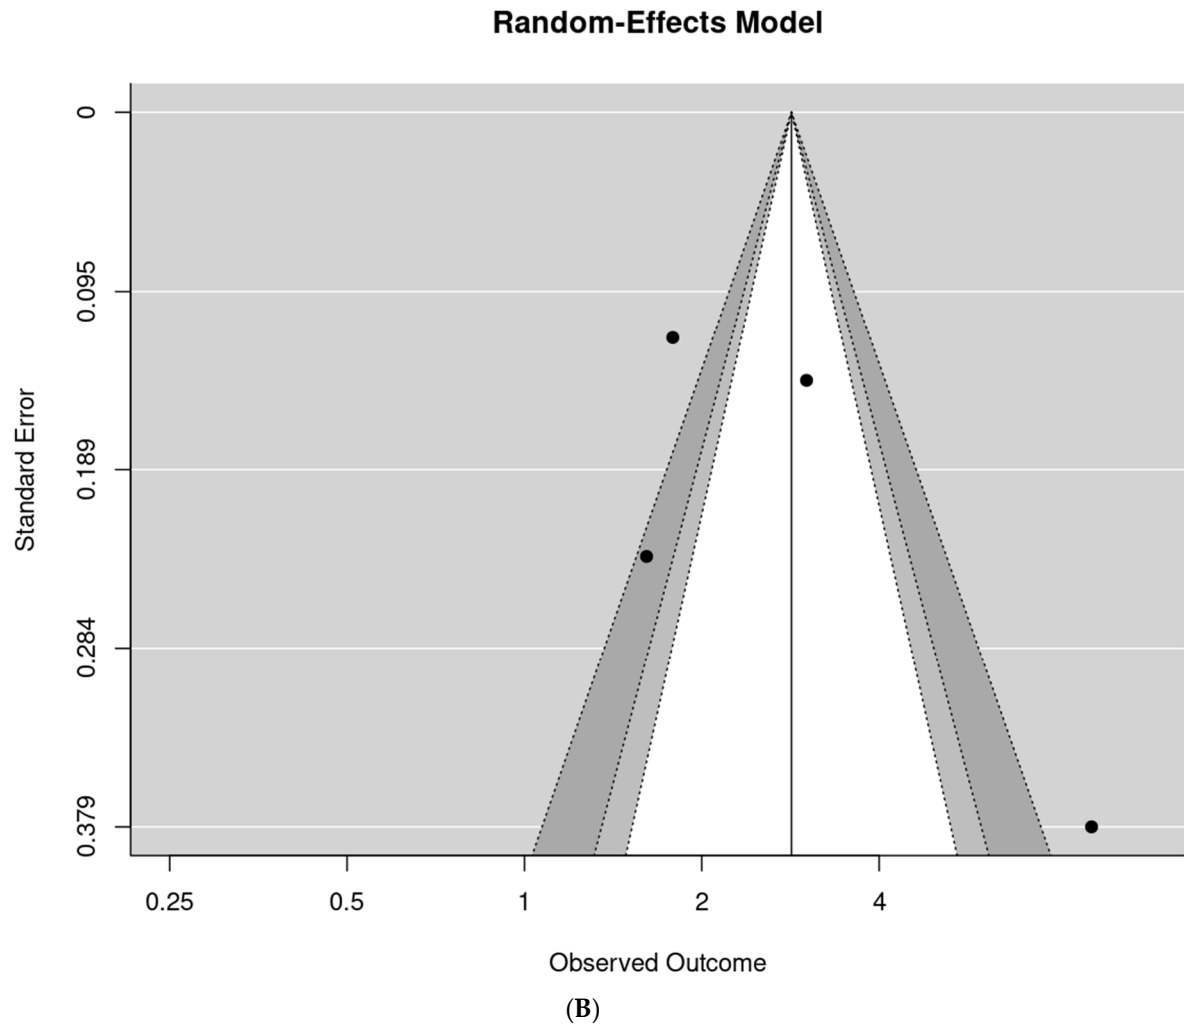

**Figure S3** (A) Funnel plot to assess the publication bias for the association between serum albumin level and in-hospital mortality in post-cardiac arrest patients. (B) Funnel plot to assess the publication bias for the association between serum albumin level and neurologic outcome in post-cardiac arrest patients.
